1 **Classification.** BIOLOGICAL SCIENCES: Evolution

2

3 **Title.** Macroevolutionary trade-offs in plant-feeding insects

4 **Authors.** Daniel A. Peterson,<sup>1</sup> Nate B. Hardy,<sup>2</sup> and Benjamin B. Normark<sup>1</sup>

5

6 <sup>1</sup>Department of Biology and Graduate Program in Organismic and Evolutionary Biology, 221 Morrill

7 Science Center, 611 North Pleasant Street, University of Massachusetts, Amherst, MA 01003

8 <sup>2</sup>Department of Entomology & Plant Pathology, 321 Funchess Hall, Auburn University, Auburn,

9 Alabama 36849

10

11 **Corresponding Author.** Daniel Peterson, Department of Biology, 221 Morrill Science Center, 611

12 North Pleasant Street, University of Massachusetts, Amherst, MA 01003.

13 Phone: (413) 545-2844. Email: [dapeters@cns.umass.edu](mailto:dapeters@cns.umass.edu)

14

15 **Keywords.** Ecological specialization, herbivory, host range, polyphagy

16

17 **Short title.** Evolutionary trade-offs in plant-feeding insects

18 **Abstract.** Most plant-feeding insects are ecological specialists restricted to one or a few closely related  
 19 host-plant species. A long-standing hypothesis asserts that natural selection favors host specialization  
 20 because of trade-offs between performance on alternative hosts, yet empirical evidence for such trade-  
 21 offs is scarce. Here we assess trade-offs between adaptations to alternative hosts over  
 22 macroevolutionary timescales in two major orders of plant-feeding insects: Lepidoptera (caterpillars)  
 23 and Hemiptera (true bugs). Across 1604 caterpillar species, we find both positive and negative  
 24 associations between presence on diverse host taxa. The patterns of these associations suggest that  
 25 different trade-offs constrain host-use over short and long evolutionary timescales. In contrast, host-use  
 26 patterns of 955 true bug species reveal uniformly positive associations between adaptations to the same  
 27 host taxa over both timescales. The lack of consistent patterns across timescales and insect orders  
 28 indicates that host-use trade-offs are historically contingent rather than universal constraints. Moreover,  
 29 we observe only broad trade-offs, suggesting that alternative evolutionary processes drive the high  
 30 degree of ecological specialization observed in most plant-feeding insects.

31

32 **Significance Statement.** The immense diversity of herbivorous insects is likely due to their host-plant  
 33 specificity, but it is less clear why most insects are so specialized. Here we use host-use records of over  
 34 2500 species in two major insect orders to test the hypothesis that trade-offs between performance on  
 35 alternative hosts drive specialization over evolutionary timescales. We find evidence for distinct long-  
 36 and short-term trade-offs in caterpillar host-use, but a complete absence of trade-offs in plant-feeding  
 37 bugs. These results suggest that host-specificity in herbivorous insects is not driven by universal  
 38 constraints on use of diverse hosts.

## 39 Main Text

40 The ubiquity of ecological specialists (1, 2) is often attributed to evolutionary constraints on  
 41 generalism (3, 4). Adaptations to one environment may come at the cost of performance in other  
 42 environments (1, 3), and such trade-offs are crucial elements of most theoretical models of the  
 43 evolution of specialization (5). Trade-offs are implied by negative correlations between traits in many  
 44 biological systems (6), but in plant-feeding insects, performance measures on alternative host species  
 45 are most often uncorrelated or positively correlated (1, 7). In fact, although plant-feeding insects are a  
 46 model system for the study of ecological specialization (1, 3), the role of trade-offs in the evolution of  
 47 insect host-specialization remains generally unsupported.

48 However, trade-offs that drive specialization in plant-feeding insects may be difficult to detect  
 49 within species (8). Host-use traits are phylogenetically conserved in many insect groups (9), and  
 50 genetic variation for use of novel hosts is often absent within a single population (4). These constraints  
 51 on host-use variation likely stem from the fact that host use is a complex trait involving multiple  
 52 interacting genetic loci (10), so the evolutionary trajectories that lead to high fitness on alternative  
 53 resources may be mutually exclusive. For example, the evolution of improved performance on one host  
 54 can select for a preference for that host, driving a positive feedback loop of further specialization (11).  
 55 When epistatic interactions are strong, the greatest variation in host-use strategies will evolve between  
 56 reproductively isolated lineages over long time scales (12), with trade-off outcomes determined by each  
 57 lineage's evolutionary history (13). Analogous macroevolutionary trade-offs have been described in  
 58 plants; the presence of alternative defensive strategies are negatively correlated over plant evolutionary  
 59 history (14). However, it remains unknown whether this functional diversification across hosts has  
 60 created macroevolutionary trade-offs for plant-feeding insects; performance on alternative hosts may  
 61 instead be positively associated if generalist adaptations have been prevalent during the evolution of  
 62 insect herbivores (15).

63 We investigated trade-offs between adaptations to diverse host taxa over long- and short-term

macroevolutionary timescales in two orders of plant-feeding insects: Lepidoptera (caterpillars) and Hemiptera (true bugs). Assuming that trade-offs should produce negative correlations between observed use of alternative host taxa for individual insect species (15), we quantified the macroevolutionary relationships between use of the most common host-plant orders in North America. We assembled the pairwise correlations between use of the focal hosts to produce network graphs of host-use relationships, revealing overall patterns of host-use evolution in each insect order. Specifically, we investigated two plausible trade-off scenarios: segregation of host orders into discrete clusters and isolation of individual host orders.

## Results

**Host-use in Lepidoptera and Hemiptera.** We obtained North American host-use records and phylogenetic data for 1604 caterpillar species and 955 bug species from online databases. Eleven host-plant orders met our prevalence cut-off of 100 species from one insect order, and each of them met the cut-off for both Hemiptera and Lepidoptera: Asterales, Caryophyllales, Ericales, Fabales, Fagales, Lamiales, Malpighiales, Pinales, Poales, Rosales, and Sapindales. Interactions with these focal host-plant orders accounted for 77% of total interactions in the Lepidoptera dataset and 57% of total interactions in the Hemiptera dataset.

**Host-use Correlations.** We inferred a time-calibrated phylogeny of each insect order (Fig. 1) and used a phylogenetic meta-analysis approach to test for evolutionary trade-offs between insect use of the focal host-plant orders. For each pairwise combination of focal host-plant orders, we estimated long- and short-term evolutionary associations between use of the two host taxa by finding maximum likelihood estimates for phylogenetic and residual correlations between host-use traits in a phylogenetic mixed model (Fig. 2A-F). We recovered both positive and negative correlations between use of the focal host orders in the Lepidoptera (Fig. 2G), but mostly positive correlations in the Hemiptera (Fig. 2H).

**Host-use Network Structure.** We used the pairwise host-use correlations to reconstruct the overall

89 network of host-use correlations over phylogenetic and residual timescales in each insect order. We  
 90 then evaluated the structure of each network to identify clusters of evolutionarily associated host taxa  
 91 as well as individually isolated host taxa. We found that the network of long-term evolutionary  
 92 relationships between lepidopteran use of the focal host orders was significantly structured ( $P < 0.01$ ),  
 93 revealing two large clusters of host taxa (Fig. 3a). Cluster membership was phylogenetically diverse:  
 94 the gymnosperm order Pinales (conifers) and monocot order Poales (grasses) were each affiliated with  
 95 a different set of eudicot orders. Short-term correlations between lepidopteran use of the focal host taxa  
 96 also showed significant network structure ( $P < 0.01$ ) but on this timescale use of all angiosperm hosts  
 97 formed a single cluster of mostly positive associations (Fig. 3b). However, use of Pinales was isolated  
 98 from the angiosperm cluster, exhibiting a statistically significant mean pairwise correlation with use of  
 99 the other focal hosts ( $-0.23$ ,  $P < 0.01$ ). In contrast, hemipteran host-use correlations indicated  
 100 significant support for a single host-use cluster encompassing all focal hosts over both phylogenetic ( $P$   
 101  $< 0.01$ , Fig. 3c) and residual timescales ( $P < 0.01$ , Fig. 3d).

102

## 103 Discussion

104 A fundamental trade-off between performance on alternative hosts remains the dominant  
 105 hypothesis to explain the planet's abundance of specialized plant-feeding insects, despite the lack of  
 106 empirical evidence for such trade-offs. Most studies have looked for trade-offs within insect species,  
 107 but the effects of trade-offs could be more obvious over longer evolutionary timescales (8). Our results  
 108 suggest that trade-offs have shaped patterns of host-use over millions of years of caterpillar evolution  
 109 and diversification. However, the lack of evidence for trade-offs among plant-feeding bugs indicates  
 110 that trade-offs are not universal, immutable constraints, but instead reflect historically contingent  
 111 processes in individual insect lineages.

112 There are many differences between Lepidoptera and Hemiptera, but their fundamentally  
 113 distinct relationships with host plants may be particularly important to understanding why the role of

trade-offs appears to be very different in the two groups. Hemiptera are sucking insects, while Lepidoptera are generally leaf-chewers (2). These two feeding modes elicit different modes of plant defensive responses (16), and sap-sucking may be particularly amenable to generalist adaptations that circumvent host defenses (17). In contrast, Lepidoptera often rely on specialized enzymes to detoxify defensive chemicals (18), which may constrain the evolution of generalism, although super-generalist Lepidoptera do exist, possibly powered by phenotypic plasticity in enzyme expression (19).

Alternatively, defense chemistry may have little influence over long-term evolutionary relationships between plants and their insect parasites. In fact, we found that long-term evolutionary trade-offs experienced by lepidopteran lineages appear to reflect a broad-scale ecological division between plant hosts rather than a history of coevolution between plants and insects (20). The relevant differences between the two host clusters we observed are not immediately clear, but the separation of predominantly woody plant taxa (e.g. Pinales, Fagales) from predominantly herbaceous taxa (e.g. Asterales, Poales) suggests the possibility of a trade-off between host growth forms or between the habitat types where those growth forms are found (21).

Although we observed few constraints on short-term evolution of lepidopteran host-use within the focal angiosperm taxa, we did find evidence for a short-term evolutionary trade-off between their use of angiosperms and the only focal gymnosperm host order, Pinales (conifers). We found that conifers and some angiosperms are used by caterpillars with similar evolutionary backgrounds, yet a trade-off between evolutionarily labile traits tends to prevent the simultaneous use of those host taxa by individual caterpillar species. Such trade-offs between labile but mutually exclusive host-use traits may be particularly significant because they can promote rapid speciation (22), driving the adaptive radiations that have produced much of the plant-feeding insect diversity on earth (23, 24). Nevertheless, the prevalence of such constraints at smaller scales, for instance between alternative host genera or species, remains unclear given that the single short-term trade-off observed here occurred over the largest phylogenetic distance present among our focal taxa.

In contrast to the patterns observed in the Lepidoptera, hemipteran host-use showed no evidence of trade-offs over long or short evolutionary timescales. This surprising result suggests that generalist adaptations that increase fitness across multiple hosts have been more important for Hemiptera than specialist adaptations to particular hosts (15). Moreover, hemipteran generalism appears completely unrestrained by host taxonomy even over very long timescales, leading to the evolution of both super-generalist species and clades where generalist strategies are common (25). However, we do not account for differences in fecundity between specialist and generalist insects on particular hosts; it may be that generalists usually have lower fitness – i.e. they are jacks of all trades but masters of none (3). Nevertheless, costs of generalism have been difficult to document (1, 26), so the positive residual correlations we observed may instead represent evolutionary breakthroughs made possible by novel mechanisms of phenotypic plasticity or other generalist adaptations (17).

Overall, we found strong evidence that both labile traits and long-term, historically contingent evolutionary processes produce important host-use constraints in plant-feeding insects. However, the relatively few, broad-scale trade-offs found here fail to explain the observation that a vast majority of plant-feeding insects are restricted to a single host family (2). It is clear that trade-offs can vary based on genetic context (13), so we cannot rule out the hypothesis that species-specific, idiosyncratic trade-offs drive ecological specialization. Nevertheless, although a few individual species-specific trade-offs have been documented (22), our results suggest that most microevolutionary trade-offs do not persist over macroevolutionary timescales. Trade-offs play an intuitive and possibly inescapable role in constraining performance across multiple tasks (6), yet host-specialization in plant-feeding insects is not necessarily driven by host-specific limitations on survival and growth. Alternative factors, such as neural constraints (27), mate-finding (28), or genetic drift (26) may ultimately shape the evolution of each species' ecological niche.

## Materials and Methods

164 **Data Collection.** Lepidopteran host-use data were downloaded from the HOSTS database  
 165 (nhm.ac.uk/hosts)(29), a collection of published records of worldwide caterpillar host-plants.  
 166 Hemipteran host-use data were downloaded from the Tri-Trophic Thematic Collection Network  
 167 database (tcn.amnh.org), a compilation of insect collection records from academic and governmental  
 168 museums in the United States. For both datasets, we restricted our analysis to records from North  
 169 America (all localities labeled USA, Canada, Mexico or Nearctic). All plant taxonomic names were  
 170 standardized with the Taxonomic Name Resolution Service (30) and insect taxonomic names with the  
 171 python package TaxonNamesResolver and the following reference databases: Aphid Species File (31),  
 172 Integrated Taxonomic Information System (itis.gov), and Catalogue of Life (catalogueoflife.org). We  
 173 created binary presence/absence matrices of lepidopteran and hemipteran species by host plant taxon,  
 174 with insects considered present on all hosts for which they had at least one host-use record. To focus  
 175 computational resources on host taxa with enough statistical power to detect evolutionary host-use  
 176 interactions, we restricted our analyses to focal host orders used by at least 100 insect species in one  
 177 insect order (~10% of the total focal insect species per order).

178 We characterized shared ancestry among the North American lepidopteran and hemipteran  
 179 species in our host-use dataset by estimating time-scaled phylogenies using a phyloinformatic approach  
 180 (see Supplemental Materials for details). Phylogenetic data were not available for all species in the  
 181 host-use dataset, but there was an overlap of host-use and phylogenetic data for 1604 lepidopteran  
 182 species and 955 hemipteran species. Phylogenies and host-use matrices for these species are available  
 183 on Dryad (datadryad.org).

184 **Statistical Analysis.** Treating each pairwise comparison between host taxa individually, we set up a  
 185 phylogenetic mixed model (32) for each insect order using the package MCMCglmm (33) in the R  
 186 statistical framework (34). We estimated the evolutionary interaction between the pair of host-use traits  
 187 using the “random=~us(trait):Insect” and “rcov=~us(trait):units” syntax to  
 188 capture both phylogenetic and residual effects. Prior parameter distributions were specified as



189 `prior<-list(R=list(V=diag(2),nu=2),`  
 190 `G=list(G1=list(V=diag(2),nu=2)))`". All MCMC chains were run for 10 million iterations  
 191 with a burn-in of 1 million iterations, and ten chains were run for each model to test for convergence.  
 192 Gelman-Rubin convergence analysis of the ten chains for each model produced potential scale  
 193 reduction factors under 1.05 in every case (99% were under 1.01), suggesting that all chains  
 194 successfully converged (35).

195 We considered two potential trade-off scenarios: isolation of individual host-use traits, and  
 196 divisions of host-use traits into clusters (characterized by positive interactions within clusters and  
 197 negative interactions between them). To characterize isolation of individual host-use traits, we  
 198 calculated the mean correlation of the ten pairwise comparisons involving each host-use trait  
 199 (separately for phylogenetic and residual correlations). To characterize associations among groups of  
 200 host-use traits, we found the network structure that maximized the structure score for the entire network  
 201 of host-use traits, defined as the sum of all pairwise correlations between host-use traits in the same  
 202 cluster minus the sum of all pairwise correlations between host-use traits in different clusters (see  
 203 Supplemental Materials for details).

204 We tested the statistical significance of the resulting values by producing a series of 100 null  
 205 datasets that simulated independent Brownian motion of a continuous character for performance on  
 206 each host order along the insect phylogenies, plus additional normally distributed residual variation  
 207 with equivalent variance. We converted the resulting continuous host performance values to a binary  
 208 host presence/absence character by assuming that only the insect species with the highest performance  
 209 values for each host taxon were present on that host, with the threshold set by matching the number of  
 210 species using that host in the empirical data (36). We then calculated all pairwise correlations between  
 211 use of the focal hosts, mean correlations per host-use trait, and whole-network structure as we did for  
 212 the empirical data. Empirical individual host-use trait mean correlations were considered statistically  
 213 significant when their absolute values exceeded the maximum absolute values of any individual mean

214 in 95% of null datasets. Empirical network structures was considered statistically significant when their  
215 scores exceeded the network structure scores of 95% the null datasets.

216

217 **Supplementary Information** is available in the online version of the paper.

218

219 **Acknowledgements** We thank D. Moen, A. Porter, L. Doubleday, and S. Noda for comments that  
220 improved the manuscript. This work was supported by the National Science Foundation (EF-1115191  
221 and DEB-1258001)

222

223 **Author Contributions** All authors were involved in the study design and wrote the manuscript. D.A.P.  
224 and N.B.H. analyzed the data.

225

226 **Author Information** The authors declare no competing financial interests. Correspondence and  
227 requests for materials should be addressed to D.A.P. (dapeters@cns.umass.edu)

228

## 229 **Literature Cited**

- 230 1. Forister ML, Dyer LA, Singer M, Stireman JO, Lill JT (2012) Revisiting the evolution of  
231 ecological interactions. *Ecology* 93:981–991.
- 232 2. Forister ML et al. (2015) The global distribution of diet breadth in insect herbivores. *Proc Natl*  
233 *Acad Sci U S A* 112:442–7.
- 234 3. Futuyma DJ, Moreno G (1988) The evolution of ecological specialization. *Annu Rev Ecol Syst*  
235 19:207–233.
- 236 4. Futuyma DJ, Keese M, Funk DJ (1995) Genetic constraints on macroevolution: the evolution of  
237 host affiliation in the leaf beetle genus *Ophraella*. *Evolution* 49:797–809.
- 238 5. Ravigné V, Dieckmann U, Olivieri I (2009) Live where you thrive: joint evolution of habitat  
239 choice and local adaptation facilitates specialization and promotes diversity. *Am Nat* 174:E141–  
240 E169.
- 241 6. Shoval O et al. (2012) Evolutionary trade-offs, Pareto optimality, and the geometry of

- phenotype space. *Science* 336:1157–1160.
7. Futuyma DJ (2008) in *Specialization, Speciation, and Radiation: The Evolutionary Biology of Herbivorous Insects*, pp 136–147.
8. Joshi A, Thompson JN (1995) Trade-offs and the evolution of host specialization. *Evol Ecol* 9:82–92.
9. Futuyma DJ, Agrawal AA (2009) Macroevolution and the biological diversity of plants and herbivores. *Proc Natl Acad Sci U S A* 106:18054–18061.
10. Remold S (2012) Understanding specialism when the jack of all trades can be the master of all. *Proc R Soc B Biol Sci* 279:4861–4869.
11. Fry J (1996) The evolution of host specialization: are trade-offs overrated? *Am Nat* 148:S84–107.
12. Satterwhite RS, Cooper TF (2015) Constraints on adaptation of *Escherichia coli* to mixed-resource environments increase over time. *Evolution* 69:2067–2078.
13. Rodriguez-Verdugo A, Carrillo-Cisneros D, Gonzalez-Gonzalez A, Gaut BS, Bennett AF (2014) Different tradeoffs result from alternate genetic adaptations to a common environment. *Proc Natl Acad Sci* 111:12121–12126.
14. Campbell SA, Kessler A (2013) Plant mating system transitions drive the macroevolution of defense strategies. *Proc Natl Acad Sci* 110:3973–3978.
15. Peterson DA et al. (2015) Phylogenetic analysis reveals positive correlations between adaptations to diverse hosts in a group of pathogen-like herbivores. *Evolution* 69:2785–2792.
16. Ali JG, Agrawal AA (2012) Specialist versus generalist insect herbivores and plant defense. *Trends Plant Sci* 17:293–302.
17. Barrett LG, Heil M (2012) Unifying concepts and mechanisms in the specificity of plant-enemy interactions. *Trends Plant Sci* 17:282–292.
18. Berenbaum MR, Feeny PP (2008) in *Specialization, Speciation, and Radiation: The Evolutionary Biology of Herbivorous Insects*, pp 3–19.
19. Li X, Schuler MA, Berenbaum MR (2002) Jasmonate and salicylate induce expression of herbivore cytochrome P450 genes. *Nature* 419:712–715.
20. Ehrlich PR, Raven PH (1964) Butterflies and plants: a study in coevolution. *Evolution* 18:586–608.
21. Futuyma DJ (1976) Food plant specialization and environmental predictability in Lepidoptera. *Am Nat* 110:285–292.
22. Nosil P, Crespi BJ, Sandoval CP (2002) Host-plant adaptation drives the parallel evolution of reproductive isolation. *Nature* 417:440–3.

- 276 23. Farrell BD (1998) “Inordinate fondness” explained: why are there so many beetles? *Science*  
277 281:555–559.
- 278 24. Janz N, Nylin S, Wahlberg N (2006) Diversity begets diversity: host expansions and the  
279 diversification of plant-feeding insects. *BMC Evol Biol* 6:4.
- 280 25. Normark BB, Johnson NA (2011) Niche explosion. *Genetica* 139:551–564.
- 281 26. Gompert Z et al. (2015) The evolution of novel host use is unlikely to be constrained by  
282 tradeoffs or a lack of genetic variation. *Mol Ecol* 24:2777–2793.
- 283 27. Bernays EA (2001) Neural limitations in phytophagous insects: implications for diet breadth  
284 and evolution of host affiliation. *Annu Rev Entomol* 46:703–727.
- 285 28. Hawthorne DJ, Via S (2002) The genetic architecture of ecological specialization: correlated  
286 gene effects on host use and habitat choice in pea aphids. *Am Nat* 159:S76–S88.
- 287 29. Robinson GS, Ackery PR, Kitching IJ, Beccaloni GW, Hernández LM (2015) HOSTS - a  
288 database of the world’s Lepidopteran hostplants. *Nat Hist Museum, London*.
- 289 30. Boyle B et al. (2013) The taxonomic name resolution service: an online tool for automated  
290 standardization of plant names. *BMC Bioinformatics* 14:16.
- 291 31. Favret C (2015) Aphid species file. Available at: [Aphid.SpeciesFile.org](http://Aphid.SpeciesFile.org) [Accessed January 1,  
292 2015].
- 293 32. Hadfield JD, Nakagawa S (2010) General quantitative genetic methods for comparative  
294 biology: Phylogenies, taxonomies and multi-trait models for continuous and categorical  
295 characters. *J Evol Biol* 23:494–508.
- 296 33. Hadfield JD (2010) MCMC methods for multi-response generalized linear mixed models: The  
297 MCMCglmm R package. *J Stat Softw* 33:1–22.
- 298 34. R Core Team (2015) R: A language and environment for statistical computing.
- 299 35. Gelman A, Rubin DB (1992) Inference from iterative simulation using multiple sequences. *Stat*  
300 *Sci* 7:457–472.
- 301 36. Felsenstein J (2012) A comparative method for both discrete and continuous characters using  
302 the threshold model. *Am Nat* 179:145–156.

303  
304

## 305 Figure Legends

306 Fig. 1. Maps of host-use traits on insect phylogenies. For each host-plant order, colored blocks indicate  
307 which insect species have been observed on that host. Insect species with no hosts shown were

308 observed only on non-focal hosts or had no host-use information associated with their locality records  
 309 (Hemiptera only). Insect families (and one superfamily) are indicated around the phylogenies as  
 310 follows: (A) Lepidoptera – 1: Noctuoidea, 2: Nymphalidae, 3: Lycaenidae, 4: Hesperidae, 5: Pyralidae,  
 311 6: Sphingidae, 7: Saturniidae, 8: Geometridae, 9: Tortricidae, 10: Gracillariidae. (B) Hemiptera – 11:  
 312 Cicadellidae, 12: Membracidae, 13: Cicadidae, 14: Miridae, 15: Tingidae, 16: Pentatomidae, 17:  
 313 Scutelleridae, 18: Coreidae, 19: Rhopalidae, 20: Lygaeidae, 21: Delphacidae, 22: Fulgoridae, 23:  
 314 Flatidae, 24: Aphididae, 25: Diaspididae, 26: Coccidae, 27: Pseudococcidae, 28: Psylloidea, 29:  
 315 Aleyrodidae.

316  
 317 Fig. 2. Phylogenetic and residual evolutionary correlations between traits. Hypothetical scenarios of  
 318 evolutionary correlation between herbivore presence on two hosts: (A) negative phylogenetic  
 319 correlation, (B) positive phylogenetic correlation, (C) negative residual correlation, (D) positive  
 320 residual correlation, (E) negative phylogenetic and positive residual correlations, (F) positive  
 321 phylogenetic and negative residual correlations. In each example, red squares on the left indicate which  
 322 species in the herbivore phylogeny are present on host 1, and blue squares on the right indicate which  
 323 species are present on host 2. (G) Empirical phylogenetic correlation by residual correlation plots of all  
 324 55 pairwise combinations of the focal host orders for Lepidoptera and (H) Hemiptera.

325  
 326 Fig. 3. Network graphs of inferred pairwise host-use correlations. (A) Lepidoptera – phylogenetic  
 327 correlations. (B) Lepidoptera – residual correlations. (C) Hemiptera – phylogenetic correlations. (D)  
 328 Hemiptera – residual correlations. Each vertex represents a host order, with vertex area proportional to  
 329 the number of insects that were observed on that host. Positive interactions between presence on a pair  
 330 of hosts are represented by solid, black lines and negative correlations by dashed, red lines, with line  
 331 thickness proportional to the magnitude of the correlation. Network spatial structure was determined  
 332 using the Kamada-Kawai algorithm (47), a force-directed layout method in which “repulsion” between

333 vertices was proportional to the inverse of one plus the correlation values between the respective hosts.

334 Vertices are labeled with the following abbreviations – Ast: Asterales, Car: Caryophyllales, Eri:

335 Ericales, Fab: Fabales, Fag: Fagales, Lam: Lamiales, Mal: Malpighiales, Pin: Pinales, Poa: Poales, Ros:

336 Rosales, Sap: Sapindales. Vertices are colored by taxonomic group – Eudicots: blue, Monocots: yellow,

337 Conifers: green. Statistically significant modules ( $P < 0.05$ ) are indicated by grey bubbles. Individual

338 host orders with mean correlations of significantly higher magnitude than expected ( $P < 0.05$ ) are

339 indicated by bold vertex outlines (black for positive means, red for negative means).



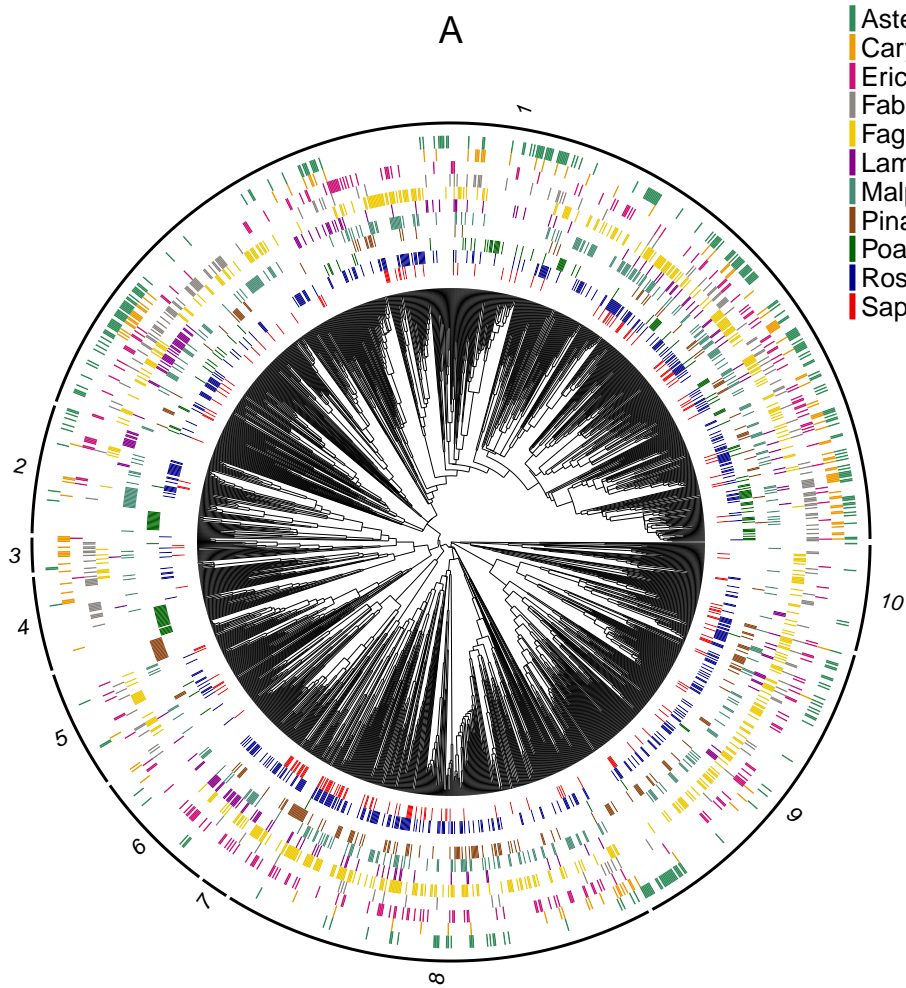

Asterales  
Caryophyllales  
Ericales  
Fabales  
Fagales  
Lamiales  
Malpighiales  
Pinales  
Poales  
Rosales  
Sapindales

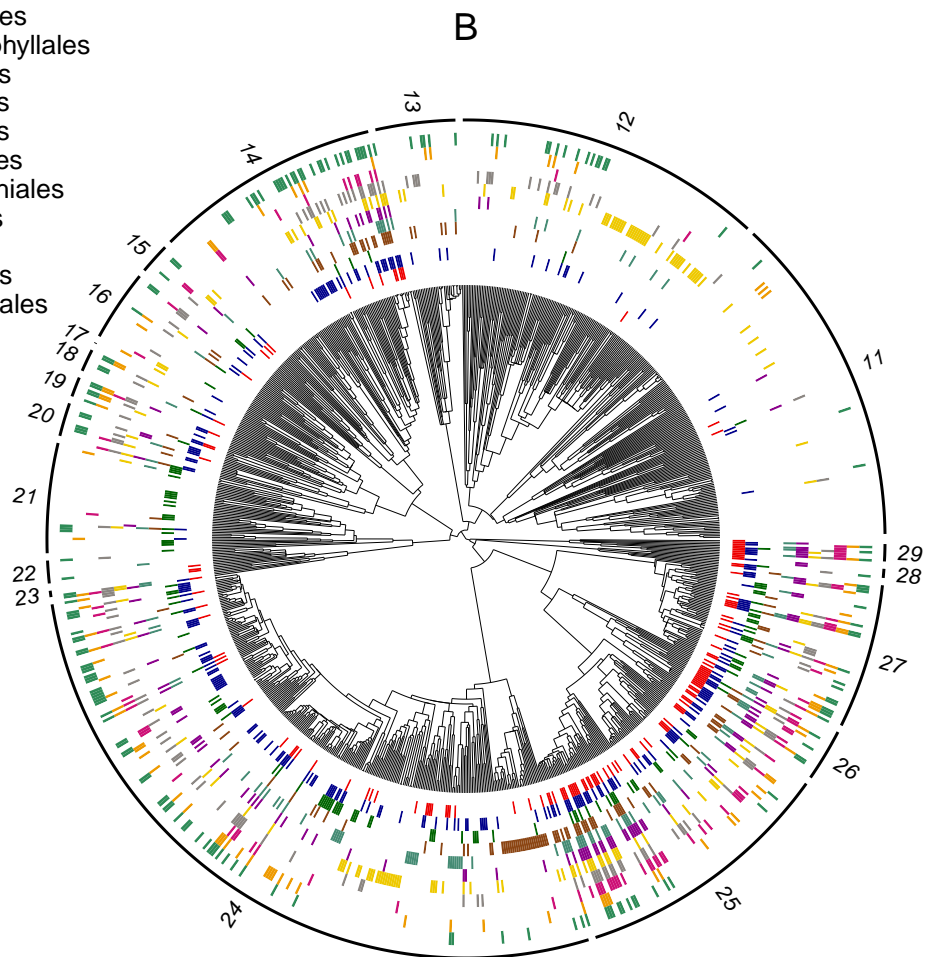

A

B

C

D

E

F

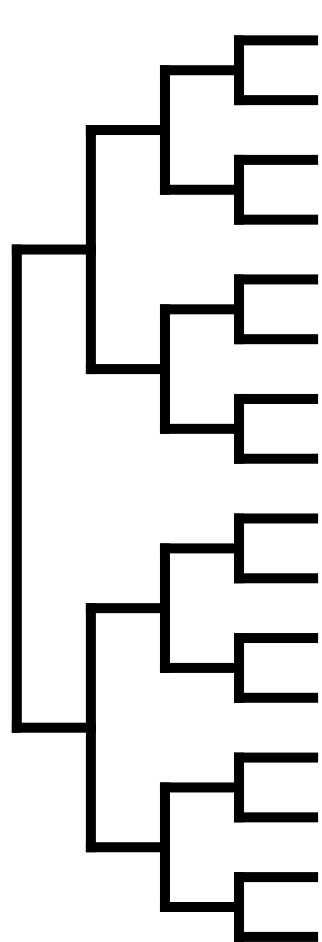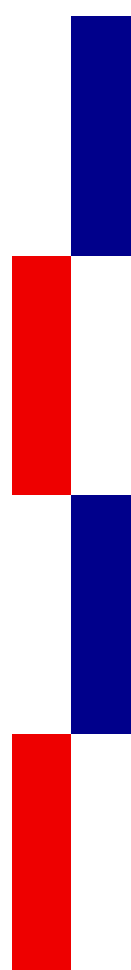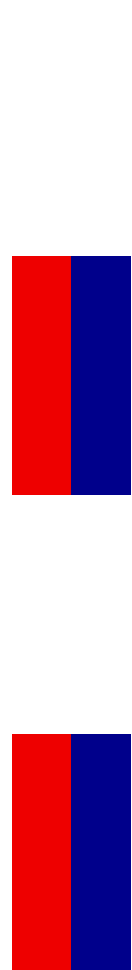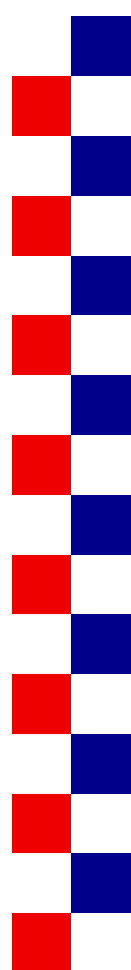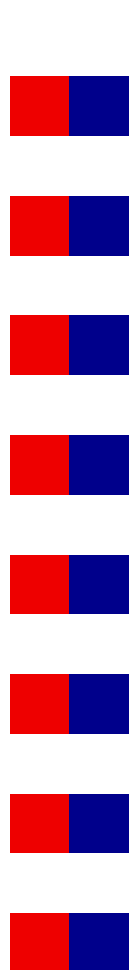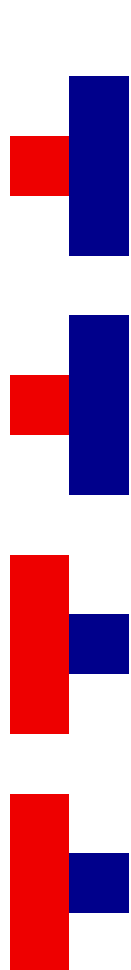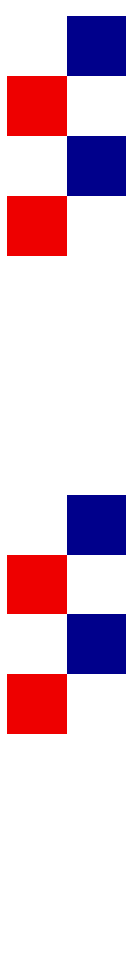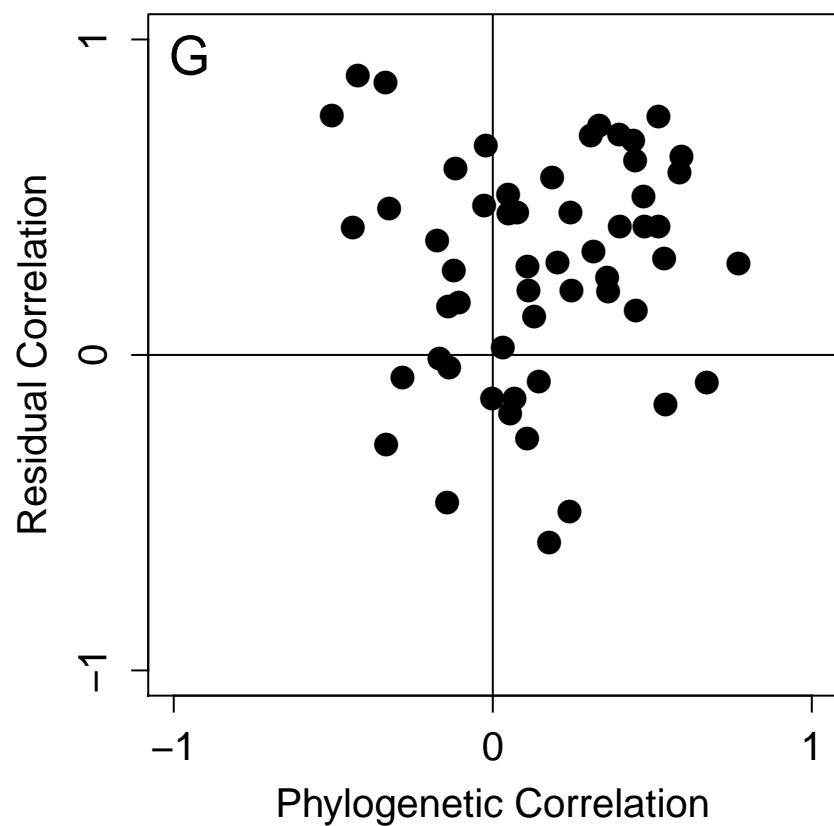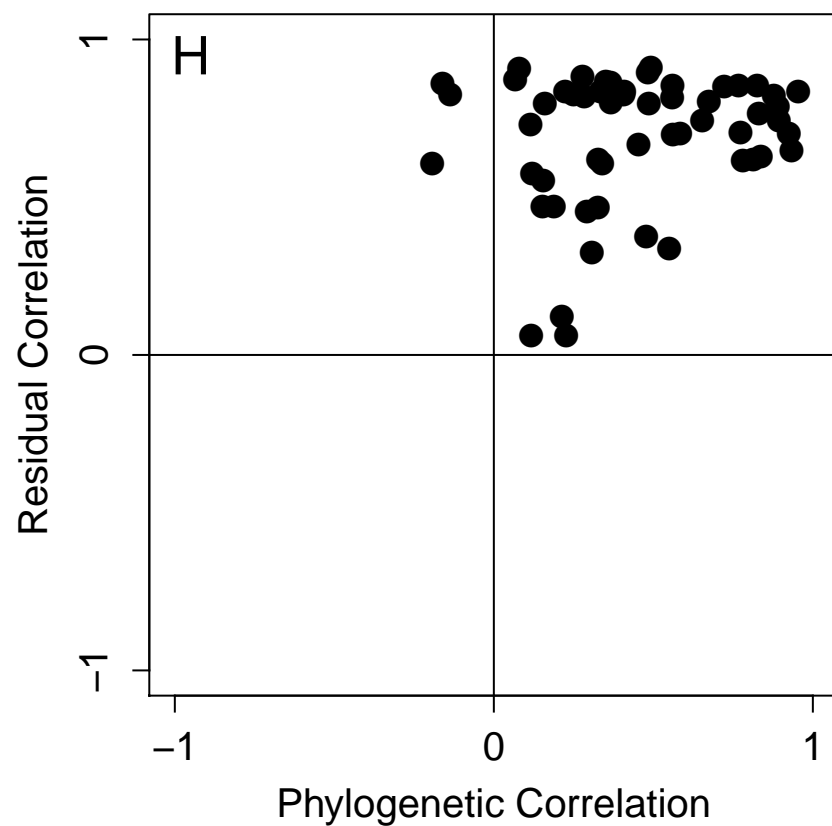



A

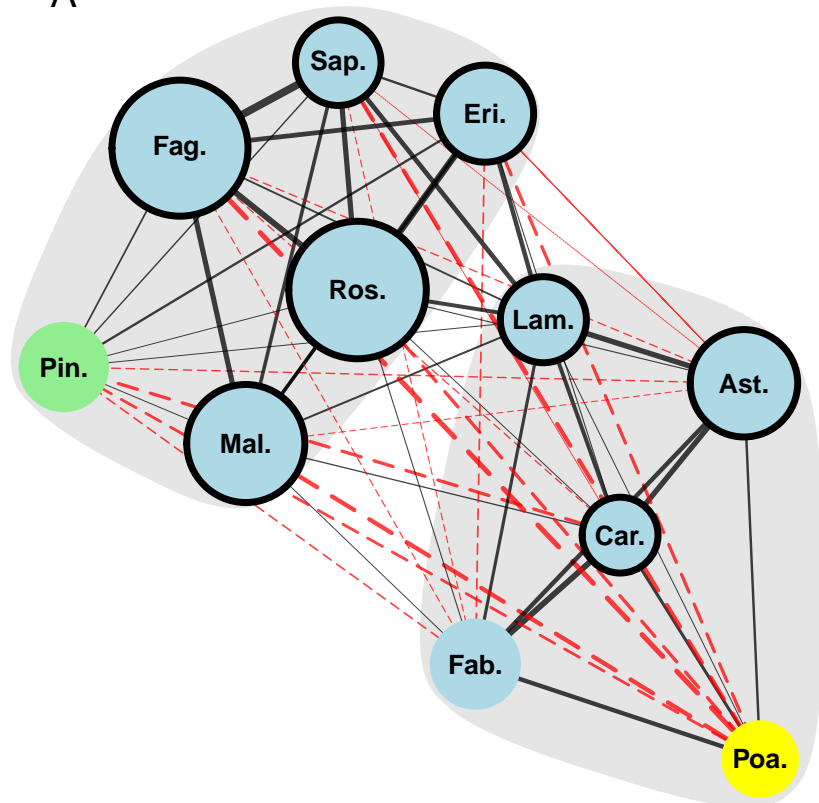

B

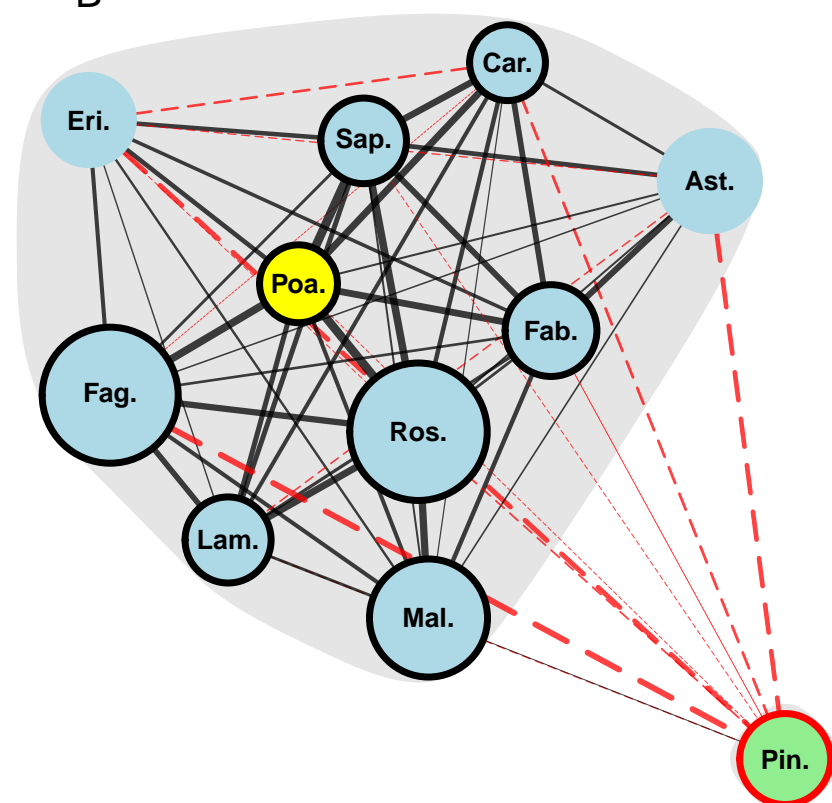

C

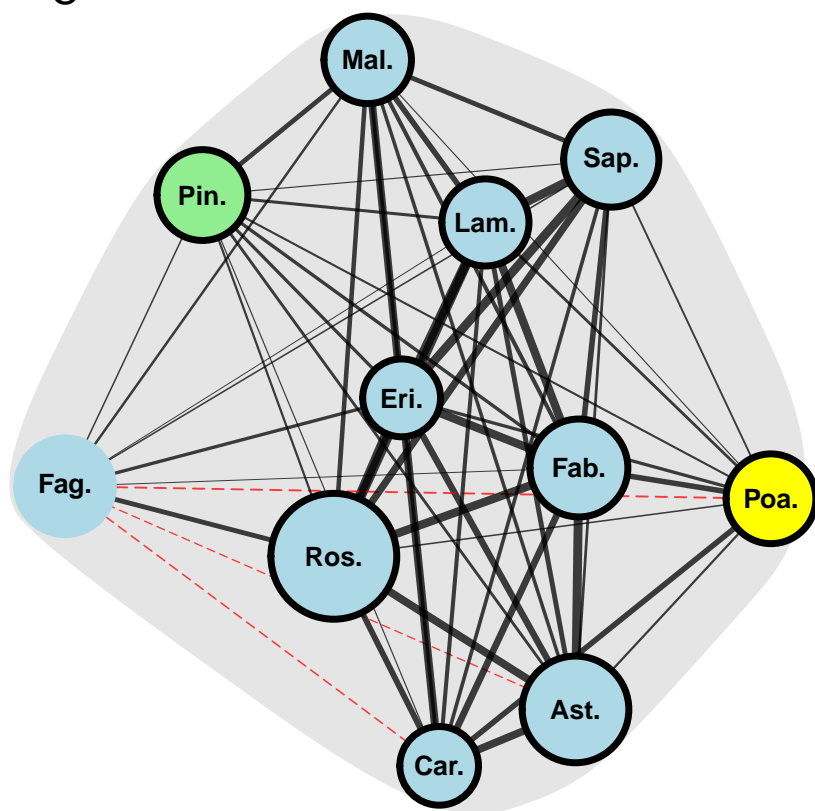

D

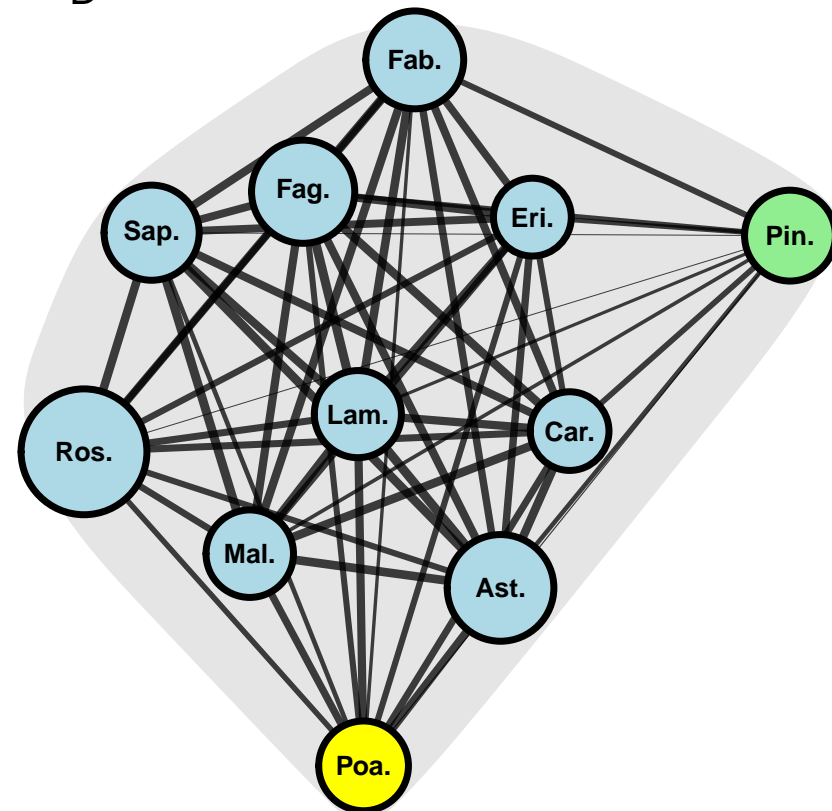

## Supplementary Methods

### Phylogeny reconstruction

Phylogenetic datasets were assembled from published DNA sequence data using the PHLAWD megaphylogeny pipeline (Smith et al. 2009). The Lepidoptera dataset consisted of 7470 sites sampled from 9 loci across 1604 species. The Hemiptera dataset comprised 9,015 sites sampled from 15 loci across 955 species. For each taxon (Lepidoptera and Hemiptera), we used the NCBI taxonomy as a constraint tree in a ML search under a GTR nucleotide substitution model with CAT-approximated among-site rate variation, with model parameters estimated independently for each locus. Using RAxML (Stamatakis 2014), we estimated phylogenies from 100 non-parametric bootstrap replicates of the multiple sequence alignment supermatrix and then used every fifth bootstrap tree as the starting tree for optimization of the empirical data. We scaled the branch lengths of the ML tree to time using Penalized Likelihood, assuming an autocorrelated model of among-lineage rate variation and selecting a value for the smoother parameter with a cross-validation procedure (treePL; Smith and O'Meara 2012).

We calibrated the Lepidoptera divergence time estimates with 4 constraints: The age of the root, which corresponds to the crown node of Apoditrysia, was fixed at 140 Ma, to match the published estimate of Wahlberg et al. (2013). Uniform constraint with a minimum age of 65 Ma and a maximum age of 140 were placed on the crown nodes of Gracillariidae, Noctuidae, and Nymphalidae based on the minimum age estimates of fossil taxa (Kozlov 1988; Martins-Neto 1989). We calibrated Hemiptera divergence time estimates with five constraints. The age of the Hemiptera root was fixed 291 Ma, to match the published median estimate of Misof et al. (2014). A minimum age of 140 and maximum age of 291 Ma were imposed on the crown node of Aphidomorpha (Brodie 1845). A minimum age of 99 and a maximum age of 291 were placed on the crown node of Pemphiginae and that of Coccidae (Kononova 1977; Vea and Grimaldi 2015). A minimum age of 197 and a maximum age of 291 were placed on the crown node of Heteroptera (Giebel 1856).

### Network Structure Analysis

To characterize the host-use association network structure, we produced a dendrogram of host-use associations from a Euclidean distance matrix calculated from the pairwise correlations between presence on the focal hosts. Agglomerative hierarchical clustering was performed by the hclust function in the R package fastcluster (Müllner 2013). After obtaining the dendrogram of host-use associations, we evaluated all possible module divisions produced by pruning the dendrogram at a single branch height. The fit of a given module structure was defined as the sum of all correlations between host-use traits in the same module minus the sum of all correlations between host-use traits in different modules. Thus, positive correlations within modules and negative correlations between modules increased the fit score, while negative correlations within modules and positive correlations between modules reduced the fit score. The module structure with the highest fit score was chosen as the best characterization of network structure.

## Literature Cited

Brodie, P. B. 1845. A History of the Fossil Insects in the Secondary Rocks of England. John Van Voorst.

Giebel, C. G. 1856. Die Insekten und Spinnen. *in* Fauna der Vorwelt mit steter Breucksichtigung der lebenden Thiere, Brodhaus, Leipzig.

48 Kononova, E. L. 1977. New aphid species (Homoptera, Aphidinea) from the Upper Cretaceous deposits  
49 of the Taymyr. *Rev. d'Entomologie l'URSS* 56:588–600.

50 Kozlov, M. V. 1988. Papilionida. Pp. 22–55 in Ponomarenko, ed. *Cretaceous Biosynthetic crisis in the*  
51 *evolution of insects*.

52 Martins-Neto, R. G. 1989. Novos insectos terciarios du Estado de São Paulo. *Rev. Bras. Geociencias*  
53 19:375–386.

54 Misof, B., S. Liu, K. Meusemann, R. S. Peters, A. Donath, C. Mayer, P. B. Frandsen, J. Ware, T. Flouri,  
55 R. G. Beutel, O. Niehuis, M. Petersen, F. Izquierdo-Carrasco, T. Wappler, J. Rust, A. J. Aberer, U.  
56 Aspöck, H. Aspöck, D. Bartel, A. Blanke, S. Berger, A. Böhm, T. R. Buckley, B. Calcott, J. Chen, F.  
57 Friedrich, M. Fukui, M. Fujita, C. Greve, P. Grobe, S. Gu, Y. Huang, L. S. Jermiin, A. Y. Kawahara, L.  
58 Krogmann, M. Kubiak, R. Lanfear, H. Letsch, Y. Li, Z. Li, J. Li, H. Lu, R. Machida, Y. Mashimo, P.  
59 Kapli, D. D. McKenna, G. Meng, Y. Nakagaki, J. L. Navarrete-Heredia, M. Ott, Y. Ou, G. Pass, L.  
60 Podsiadlowski, H. Pohl, B. M. von Reumont, K. Schütte, K. Sekiya, S. Shimizu, A. Slipinski, A.  
61 Stamatakis, W. Song, X. Su, N. U. Szucsich, M. Tan, X. Tan, M. Tang, J. Tang, G. Timelthaler, S.  
62 Tomizuka, M. Trautwein, X. Tong, T. Uchifune, M. G. Walz, B. M. Wiegmann, J. Wilbrandt, B.  
63 Wipfler, T. K. F. Wong, Q. Wu, G. Wu, Y. Xie, S. Yang, Q. Yang, D. K. Yeates, K. Yoshizawa, Q.  
64 Zhang, R. Zhang, W. Zhang, Y. Zhang, J. Zhao, C. Zhou, L. Zhou, T. Ziesmann, S. Zou, X. Xu, H.  
65 Yang, J. Wang, K. M. Kjer, and X. Zhou. 2014. Phylogenomics resolves the timing and pattern of insect  
66 evolution. *Science* 346:763–767.

67 Müllner, D. 2013. fastcluster: Fast hierarchical, agglomerative clustering routines for R and Python. *J.*  
68 *Stat. Softw.* 53:1–18.

69 Smith, S. A., J. M. Beaulieu, and M. J. Donoghue. 2009. Mega-phylogeny approach for comparative  
70 biology: an alternative to supertree and supermatrix approaches. *BMC Evol. Biol.* 9:37.

71 Smith, S. A., and B. C. O'Meara. 2012. treePL: divergence time estimation using penalized likelihood  
72 for large phylogenies. *Bioinformatics* 28:2689–2690.

73 Stamatakis, A. 2014. RAxML version 8: a tool for phylogenetic analysis and post-analysis of large  
74 phylogenies. *Bioinformatics* 30:1312–3.

75 Veà, I. M., and D. A. Grimaldi. 2015. Diverse new scale insects (Hemiptera: Coccoidea) in amber from  
76 the Cretaceous and Eocene with a phylogenetic framework for fossil Coccoidea. *Am. Museum Novit.*  
77 3823:1–15.

78 Wahlberg, N., C. W. Wheat, and C. Peña. 2013. Timing and patterns in the taxonomic diversification of  
79 Lepidoptera (butterflies and moths). *PLoS One* 8:1–8.
